Cite this article as: Benussi S, de Maat GE. Atrial remodelling and function: implications for atrial fibrillation surgery. *Eur J Cardiothorac Surg* 2018;53:i2–i8.

# Atrial remodelling and function: implications for atrial fibrillation surgery

Stefano Benussi<sup>a,\*</sup> and Gijs E. de Maat<sup>b</sup>

<sup>a</sup> Division of Cardiac Surgery, University Hospital Zurich, Zurich, Switzerland

<sup>b</sup> Department of Cardiothoracic Surgery, University Medical Centre Groningen, Groningen, Netherlands

\* Corresponding author. Division of Cardiac Surgery, University Hospital Zurich, Ramistrasse 100, 8032 Zurich, Switzerland. Tel: +41-44-2552303; fax: +41-44-2554446; e-mail: stefano.benussi@usz.ch (S. Benussi).

Received 6 May 2017; received in revised form 21 July 2017; accepted 11 August 2017

## Summary

The exact mechanism of atrial fibrillation (AF) is still incompletely understood. A number of alterations that impact focal electrical discharge, the atrial substrate and modulating factors contribute to its pathogenesis. Atrial remodelling (resulting in atrial cardiomyopathy) sets the stage for AF development. Once present, AF results in the loss of synchronized atrial contraction, which affects ventricular filling and atrial reservoir and conduit functions. Passive atrial function is particularly important in patients with left ventricular diastolic dysfunction. AF can cause tachycardiomyopathy, a mostly reversible cardiac alteration induced by tachycardia. At a structural level, atrial support is also instrumental to the function of atrioventricular valves. All of these functions can be recovered to variable degrees via rhythm control strategies. Surgical and hybrid ablation show very promising results, especially in patients with a more advanced disease substrate. This review highlights the pathophysiological aspects of AF related to left atrial function and their practical implications for surgical rhythm management.

**Keywords:** Atrial fibrillation • Ablation • Left atrial function • Atrial remodelling

## INTRODUCTION

The exact mechanism of atrial fibrillation (AF) is multifactorial and still not completely understood [1]. Atrial remodelling, resulting in atrial cardiomyopathy, sets the stage for AF development [2]. Once present, AF causes loss of atrial mechanical function [3, 4]. In addition to palpitations, AF can cause tachycardiomyopathy—reversible alterations of ventricular function [5]. At a structural level, atrial support is instrumental to atrioventricular valve function [6]. These functions can be recovered through rhythm control strategies. Despite numerous studies on electrophysiology procedures and novel imaging techniques, left atrial function has not been thoroughly investigated. Also, the long-term results of percutaneous AF ablation are still far from satisfactory [7]. Stand-alone surgical and hybrid ablation has shown very promising results, especially in patients who are refractory to medical and transcatheter therapies [8–10]. Patients with heart failure (HF) could benefit from a preserved atrial function. Concomitant ablation offers the possibility to aid reverse remodelling and improve atrial function. This review highlights the pathophysiological aspects of AF with regard to left atrial function and aims to illustrate the practical implications for surgical rhythm management.

## PATHOGENESIS

The pathogenesis of AF is driven by 3 elements: an electrical trigger for arrhythmia initiation, an arrhythmogenic substrate for its maintenance and modulating factors.

## Electrical trigger

A focal source in the pulmonary veins can trigger AF, and ablation of this source can prevent recurrence of AF [11]. The mechanism inducing focal activity may involve triggered activity, rotors and localized re-entry [12, 13]. Stable micro-reentrant sources have been documented as mechanisms of paroxysmal AF and in some patients with persistent AF [14]. Back in the 1950s, Moe and Abildskov [15] proposed that AF could be perpetuated by continuous conduction of multiple independent wavelets activating the atrial wall in an apparently chaotic manner. Three decades later this was confirmed both experimentally and clinically by Cox *et al.* [16] Remote fibrillatory propagation from focal sources of AF is usually undistinguishable from multiple wavelet propagation, as it follows similar propagation patterns [17].

## Atrial remodelling and substrate

Stretch, caused by pressure and volume overload but also ageing, hypertension, HF and AF itself, results in progressive structural remodelling of the atria [18, 19]. Fibroblast activation with connective tissue deposition leads to atrial fibrosis. Research has shown that already 6 weeks after the onset of AF, a significant increase in fibrosis and impaired mechanical left atrial (LA) function is observed [20]. In addition to fibrosis, inflammatory infiltrates, necrosis, fatty infiltration, amyloidosis and cardiomyocyte

hypertrophy are commonly observed in remodelled atria [21, 22]. These changes can lead to contractile dysfunction and chamber dilatation and are usually more pronounced in the left atrium. Within the left atrium, the atrial area tends to be affected more than the left atrial appendage (LAA) [23]. Since a combination of such factors is found in many conditions predisposing a patient to AF prior to the onset of the arrhythmia, there is growing consensus that a definition of 'atrial cardiomyopathy' would be more appropriate [2]. Structural remodelling also results in the alteration of ion channels, electrical dissociation between muscle bundles and local conduction heterogeneity [24], favouring focal firing and electrical re-entry [25]. Structural remodelling in the right atrium has been associated with sinus node dysfunction [26]. Atrial dysfunction also results in a prothrombotic status due to blood stasis, which is more pronounced in the LAA. Even short AF episodes can result in a prothrombotic state due to myocardial damage and endocardial expression of prothrombotic factors [27]. Structural remodelling is a progressive process, and most of its features are only partially reversible. The treatment success of stand-alone catheter ablation appears to be related to the extent of atrial fibrosis as detected by late gadolinium enhancement magnetic resonance imaging (MRI) [28]. Early diagnosis and aggressive treatment is important, not only for AF burden reduction but also to prevent progression of structural remodelling [29].

## Modulating factors

Reverse remodelling does not seem to occur consistently in patients with lone AF after successful ablation [30]. In patients with mitral stenosis and sinus rhythm, loss of cardiomyocytes and endocardial scarring is observed, suggesting atrial myopathy precedes AF [31]. In patients with mitral stenosis who undergo balloon commissurotomy, reduced LA pressure promotes LA volume reduction, indicating progressive reverse remodelling [32]. Mitral regurgitation (MR) also leads to atrial remodelling, including fibrosis and LA dilatation [33]. As is the case for mitral stenosis, reverse remodelling with LA volume reduction occurs soon after surgical correction of chronic severe MR [34]. Aortic stenosis can also cause reversible LA dilatation, leading to a higher risk for AF [35].

## LEFT ATRIAL MECHANICAL FUNCTIONS

During ventricular systole, the LA collects and stores incoming blood, serving as a 'reservoir'. During the early phase of ventricular diastole, the LA empties passively into the left ventricle (LV), working as a 'conduit'. Finally, through its 'booster' function the LA actively 'kicks' more blood into the LV during the late ventricular diastole.

1. The LA reservoir function is the result of an interplay between atrial compliance during ventricular systole, atrial contraction and relaxation and apical displacement of the atrioventricular valves as a result of ventricular contraction [36]. Because of its increased compliance and relevant volume, the LAA contributes substantially to the reservoir function of the LA.
2. The conduit function occurs during early diastole and accounts for about one-third of the atrial flow [37]. It is more closely related to LV compliance and strongly interdependent

with the reservoir function. LA size increases in response to increased pressure and volume. This physiological compensation initially accounts for an increase in contraction of the atrial myocardium. Progressive dilatation and stretching of the atrial cardiomyofibres result in impaired atrial contractility, in line with the Frank-Starling curve [38].

3. The LA booster function depends not only on the contractile properties of the atrium but also on venous return and on LV end-diastolic pressure. It accounts for about 15–30% of left ventricular filling in a normal heart under resting conditions [3, 4, 39].

These described LA functions can be quantified using echocardiographic speckle-tracking strain and strain rate assessment (Fig. 1). This has made it possible to quantify these functional components of the LA independently from left ventricular diastolic function [40]. Reservoir strain and strain rate are predictors of sinus rhythm (SR) recovery after ablation, as they are indices of atrial fibrosis and remodelling. It is currently recommended to perform echocardiography analysis to assess valvular disease, LV size and function and atrial size. Left atrial function analysis is not yet recommended, and we believe this should be included as a part of clinical and research practice, both before ablation and during follow-up [9]. Besides echocardiography assessment, LA functional parameters can also be measured using cardiac magnetic resonance imaging (CMRI). This has proved to provide very reliable LA function quantification [41]. CMRI can be used as an alternative when detailed assessment is required and is considered to be the gold standard. In addition to LA function analysis, CMRI offers the potential to assess atrial scars and fibrosis, which is related to the degree of atrial remodelling and ablation outcomes [28]. However, the role of functional CMRI still needs to be evaluated in large clinical studies and is costly, time-consuming and incompatible with patients who carry implanted ferromagnetic materials. Moreover, an irregular heart rhythm reduces the image quality of CMRI compared with sinus rhythm. Improvement of the available CMRI techniques could increase the potential of this method. Furthermore, very limited data are available for CMRI in patients with AF and mitral valve disease.

## ATRIAL MECHANICAL FUNCTION IN PATIENTS WITH HEART FAILURE

AF and HF can cause and exacerbate each other, whereas treatment of either condition may reduce the progression of both [42]. The contribution of the atrial booster pump function is believed to increase to 30–40% in the presence of impaired left ventricular filling [43]. Reservoir and conduit functions of the left atrium are currently believed to play an important role in determining the diverse phenotypes of LV diastolic dysfunction. In fact, only a limited proportion of patients with LV diastolic dysfunction develop HF with preserved ejection fraction (HFpEF). Although atrial dysfunction in HFpEF has traditionally been regarded as secondary and proportional to the degree of LV impairment, recent findings suggest that mechanical LA failure is an early driver of HFpEF. Together with the loss of booster function, a global worsening of reservoir and conduit functions (reduced atrial strain) typically occurs after AF onset in these patients and prompts a worsening of functional capacity [44].

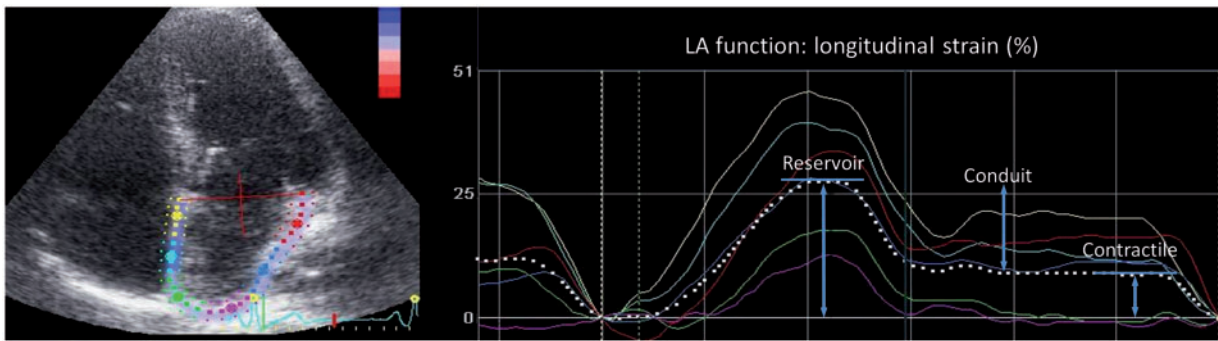

**Figure 1:** LA function measured by longitudinal strain. Reservoir function is calculated as maximal LA wall deformation during LV systole when compared with the pre-set reference point (end diastole), conduit function as maximal LA wall deformation during early LV diastole and contractile function as the maximal LA wall deformation during late LV diastole. LA: left atrium; LV: left ventricle.

## ATRIAL MECHANICAL FUNCTION AND ABLATION

The recovery of LA booster function has been traditionally regarded the main benefit of sinus rhythm recovery, although the amount of postablation LA contraction recovery has been found to be reduced when compared with non-ablated controls in SR [45–47]. It should be noted that any form of cardiac surgery alters atrial function (most probably due to adhesions following pericardiotomy), also in non-AF patients. A strict interaction was detected between postoperative LA reverse remodelling and LA contractility recovery, as a decrease of LA size favoured the atrial ‘kick’ reappearance, and *vice versa*. Patients with lone AF have impaired myocardial energetics and subtle LV dysfunction, which do not always normalize following ablation, even after AF has been abolished [48].

Independently of rhythm outcome, the probability of recovering of active atrial contraction seems reduced once a certain degree of atrial remodelling has been reached. Tinetti *et al.* [49] found recovery of LA contraction to occur only in 37% of patients with rheumatic heart disease following concomitant maze surgery for persistent AF. A longer duration of AF and the amount of atrial remodelling were found to predict AF recurrence [49, 50].

Scarring and electrical exclusion of areas of atrial myocardium caused by ablation surgery can impair recovery of atrial contraction [51–53]. Our group demonstrated minimally invasive epicardial ablation for AF results in a significant reduction of LA conduit and reservoir function [52].

Different lesion sets have been applied to preserve the LA contractile function [45, 54]. Nevertheless, lesion sets without a posterior *en bloc* ‘box’ isolation of the pulmonary veins are associated with poorer efficacy [10]. Current echocardiography guidelines actively recommend the evaluation of LA function after AF ablation to predict the maintenance of sinus rhythm and also to identify patients at risk for LA failure or arrhythmias [55].

## TACHYCARDIOMYOPATHY

AF can lead to systolic dysfunction and ventricular dilatation. Tachycardia-mediated HF due to AF was first described in 1913 [56], but the pathogenesis is still not completely understood. Calcium overload and high-energy phosphates depletion, decreased myocardial perfusion and oxidative stress contribute to the pathogenesis of tachycardia-mediated myopathy or tachycardiomyopathy [5, 57]. This condition affects all cardiac

chambers, but the most relevant changes occur in the LV. Cardiac output is decreased, filling pressure is increased and mitral regurgitation can occur due to the loss of intrinsic contractility and progressive dilatation without hypertrophy [58]. To a lesser extent, tachycardiomyopathy also affects ventricular diastolic function due to incomplete relaxation. Most of these functional aspects of tachycardiomyopathy are reversible, although hypertrophy and diastolic dysfunction can remain [59]. For these reasons, management of arrhythmia is pivotal in patients with tachycardiomyopathy. Patients with AF and HFrEF respond much better to rhythm control by ablation than to ablate-and-pace strategy [60]. Assessing the contributory role of tachycardiomyopathy in the context of persistent AF and ventricular dysfunction remains challenging. Echocardiographic assessment may aid in determining the AF-related component [60].

## ATRIAL FUNCTION-RELATED MITRAL REGURGITATION

LA enlargement, distension and remodelling are the main pathophysiological determinants of AF onset in patients with mitral disease. Both MR and AF-induced tachycardiomyopathy can initiate a vicious circle by promoting left ventricular dysfunction and remodelling [60, 61] and potentially increasing mitral regurgitation (Fig. 2). AF also promotes tricuspid and mitral annular dilatation by causing atrial remodelling and dilatation, resulting in MR and tricuspid regurgitation, irrespective of left ventricular size and function [6, 62, 63]. This ‘atrial functional MR’ has been found to occur in up to 6% of patients undergoing transcatheter AF ablation and appears to be reversible in more than two-thirds of patients [6]. Similarly, maze surgery concomitant to mitral valve repair has been shown to prevent dilatation of atria and the tricuspid annulus [64].

## THE ROLE OF THE LEFT ATRIAL APPENDAGE

Approximately 90% of atrial thrombi in non-rheumatic AF and 60% of thrombi in patients with rheumatic mitral valve disease are found within the LAA [65]. This finding prompted an increased interest in surgical and endovascular closure of the LAA. Open cardiac surgery offers the unique opportunity to amputate, clip or suture the appendage. But complete LA exclusion has proved challenging, and incomplete closure or amputation may cause a higher risk for thromboembolic events [66, 67].

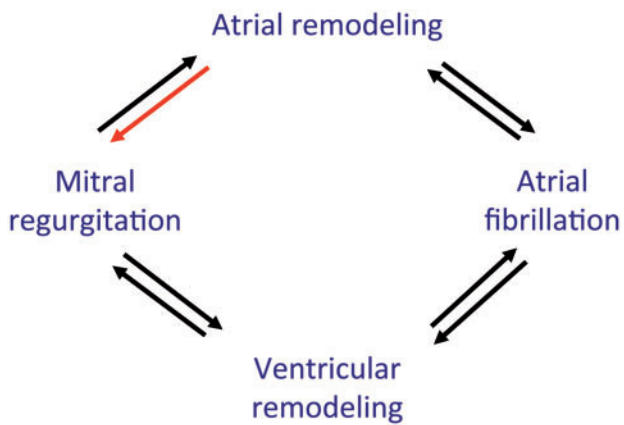

**Figure 2:** Interplay of atrial fibrillation, mitral regurgitation and cardiac remodelling.

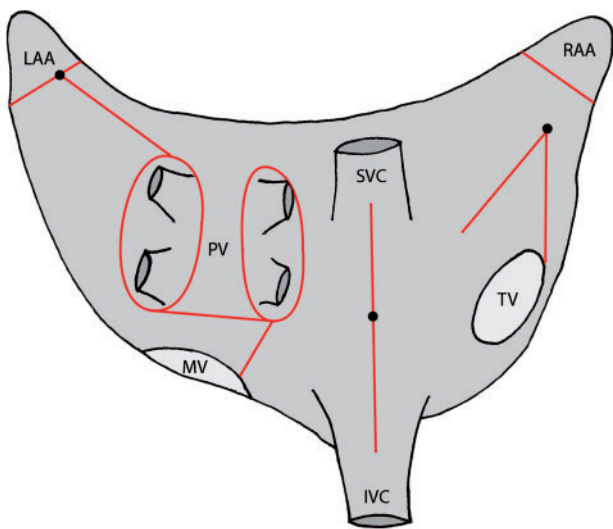

**Figure 3:** Cox-maze IV lesion set using a bipolar radiofrequency clamp. IVC: inferior vena cava; LAA: left atrial appendage; MV: mitral valve; PV: pulmonary veins; RAA: right atrial appendage; SVC: superior vena cava; TV: tricuspid valve.

Recently, epicardial clipping of the LAA has provided a means for the consistent occlusion and electrical isolation of the LAA [68, 69]. However, the beneficial effect on morbidity and mortality has yet to be demonstrated. Use of the percutaneous LAA exclusion device showed no clear-cut advantage over oral anticoagulants, with a persistent risk of ischaemic stroke in the device groups and one-third of the patients with a residual leak [70, 71]. Moreover, the potential effects of LAA exclusion on LA function have not been thoroughly studied. This observation notwithstanding, the LAA is amputated or closed by a clip on a large scale in stand-alone and concomitant AF surgery. The recently published Clinical Practice Guidelines for the Surgical Treatment of AF have promoted a Class IIA recommendation (level of evidence C) to routinely perform LAA exclusion in patients undergoing concomitant or stand-alone ablation surgery or in any AF patient undergoing cardiac surgery [72]. The ongoing Left Atrial Appendage Occlusion Study (LAAOS) III, randomizing 4700 open cardiac surgery patients to either LAA occlusion or not, will hopefully shed some light on this issue [73]. Accurate detection of possible underlying cardiomyopathies should be pursued, and

the benefits of LAA occlusion, in terms of thromboembolic prophylaxis, and possibly also in terms of rhythm control, should be balanced against the potential for haemodynamic impairment, especially in patients without persistent arrhythmias.

In recent years, novel oral anticoagulant (NOAC) medications have become available: rivaroxaban, apixaban and dabigatran. The main advantage is that NOAC do not require blood work monitoring and have minimal interaction with other medication. However, NOACS are not approved for patients with valvular disease. The only approved oral anticoagulant for patients with mechanical heart valves is warfarin. A randomized trial (REALIGN) of dabigatran versus warfarin in patients with mechanical valves showed an increase in ischaemic events and bleeding in patients using dabigatran. For AF patients without mechanical valve prosthesis, randomized controlled trials showed that NOACs were as effective (rivaroxaban and apixaban) or more effective (dabigatran) in reducing stroke risk compared with warfarin [74]. Recent real-world data confirmed these results [75]. Of the available NOACs, only apixaban was associated with overall mortality reduction compared with warfarin. For transcatheter ablation, NOACs have proved to be effective in periprocedural stroke risk [76]. However, during stand-alone thoracoscopic pulmonary vein isolation and hybrid AF ablation, warfarin is still the oral anticoagulant of choice to reduce the risk of stroke.

## CONCOMITANT ATRIAL FIBRILLATION ABLATION

Considering the potential benefits of reverse remodelling in patients with valvular disease, a more aggressive approach to concomitant ablation would seem reasonable. Unlike lone AF, surgical correction of the cause of volume/pressure overload, combined with maze surgery (Fig. 3), can restore atrial function. Particularly when left ventricular dysfunction is present, combining maze surgery provides the double advantage of reversing the tachycardiomyopathy and promoting reverse atrial remodelling [77]. When concomitant diastolic dysfunction is present (aortic stenosis, hypertrophic obstructive cardiomyopathy, severe hypertension, advanced age and HFpEF in general), recovery of SR and reverse atrial remodelling provides optimal improvement of LA mechanical function, also favouring diastolic filling. Experienced centres have demonstrated that the added risk of concomitant ablation is negligible [78]. Additionally, performing a maze procedure concomitantly at the time of open surgery can also enhance the regression of intermediate functional MR and prevent subsequent development of tricuspid regurgitation by ruling out the functional component of atrioventricular annulus dilation [64]. LA reduction surgery proposed by some authors as an adjunct to maze, to improve rhythm outcome, must be considered with caution as it can potentially reduce the LA reservoir function [79]. More extensive electrical isolation of the basal posterior LA through ablation can be a valuable and likely safer alternative for substrate modification.

## STAND-ALONE ATRIAL FIBRILLATION ABLATION

As the benefits of rhythm control for persistent and for long-standing persistent AF become more evident, and the results of catheter ablation remain hampered [7], the interest for lone AF surgery is growing [9, 72] (Fig. 4). Both thoracoscopic and open rhythm surgery are not likely to completely revert the underlying

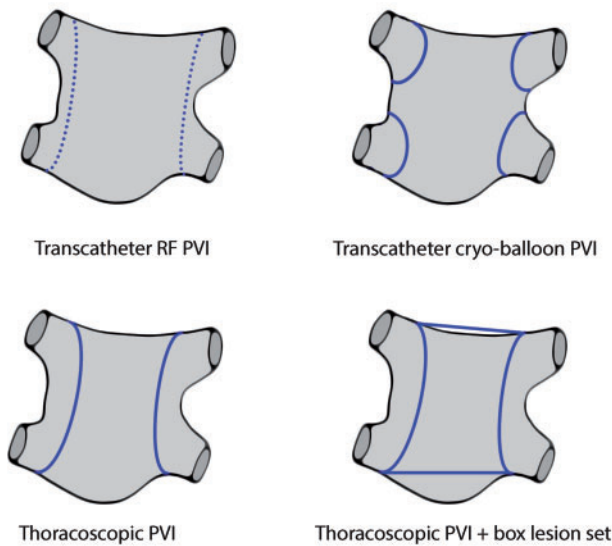

**Figure 4:** Minimally invasive left atrial ablation methods. Transcatheter radiofrequency point-by-point wide circumferential ablation, transcatheter cryoballoon PVI, thoracoscopic bipolar radiofrequency PVI and thoracoscopic bipolar radiofrequency PVI with a box lesion set created with a linear bipolar ablation pen. PVI: pulmonary vein isolation; RF: radiofrequency.

atrial myopathy, but they provide a high probability of achieving sinus rhythm and durable symptom relief [8, 10]. Early stand-alone ablation can prevent tachycardiomyopathy and also improves left ventricular function [80]. However, little is known on the long-term effects on cardiac function, and further research into this topic is warranted. A deeper insight into atrial myopathy/remodelling would help refine the indications for stand-alone ablation surgery and would be instrumental to determining the hierarchy of the ablation procedure to be performed.

In cases of non-advanced myopathy, catheter ablation could be attempted initially, while thoracoscopic, hybrid thoracoscopic (Fig. 5) and transcatheter ablation or even open ablation surgery may be appropriate choices for cases with advanced remodelling.

## CONCLUSIONS AND IMPLICATIONS FOR ATRIAL FIBRILLATION SURGERY

Although AF is associated with impaired quality of life, stroke, HF and death, studies have shown that rate control is not-inferior to rhythm control and that rhythm control is only indicated for reduction of symptoms, not for improvement of survival. Therefore, the reason for ablation must be considered carefully. The main benefits of (concomitant) ablation are symptom reduction, improvement of ventricular/cardiac function and prevention of tachycardiomyopathy. AF impairs not only the left 'atrial kick' but also the reservoir and conduit function. Modern rhythm management surgery offers the unique opportunity to reverse most of the negative effects of AF at a ventricular, atrial and valvular level. Because AF is a progressive disease, aggressive application of durable, transmural and continuous lesion sets can prevent electrical and structural remodelling of the left atrium. Structural assessment of atrial function and fibrosis (echocardiographically or by means of CMRI) is recommended and can aid in patient selection and may predict the capacity for re-remodelling following ablation, eventually improving ablation outcomes. To reduce the risk for

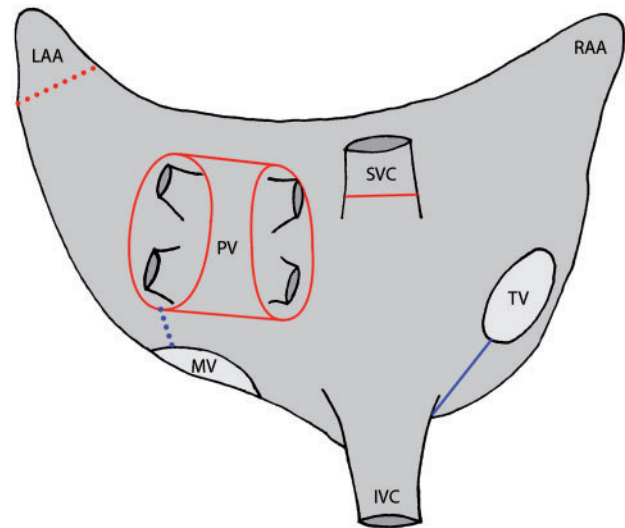

**Figure 5:** Hybrid epicardial and endocardial lesions. Hybrid epicardial and endocardial lesion set, red lines depict the thoracoscopically applied lesions, and blue lines depict transcatheter lesions. Dotted lines imply optional lesions, the LAA amputation (surgical) and MV isthmus line (transcatheter). IVC: inferior vena cava; LAA: left atrial appendage; MV: mitral valve; PV: pulmonary vein; RAA: right atrial appendage; SVC: superior vena cava; TV: tricuspid valve.

thromboembolic events and to improve rhythm outcome, exclusion of the LAA is performed on a large scale, but beneficial effects of these techniques are yet to be demonstrated. Also, the long-term effect of LAA exclusion on LA and left ventricular function is still unknown, and (long-term) follow-up by means of echocardiography or CMRI is recommended. A better understanding of AF pathophysiology and underlying atrial disease may help the transition towards a more personalized approach to identifying more appropriate indications and make the right choice of procedure for the individual patient.

## ACKNOWLEDGEMENTS

We thank Mattia Valente for his revision of the manuscript and Aanke Bijleveld for her contribution to the figures.

**Conflict of interest:** none declared.

## REFERENCES

- [1] Lau DH, Schotten U, Mahajan R, Antic NA, Hatem SN, Pathak RK *et al.* Novel mechanisms in the pathogenesis of atrial fibrillation: practical applications. *Eur Heart J* 2016;37:1573–81.
- [2] Goette A, Kalman JM, Aguinaga L, Akar J, Cabrera JA, Chen SA *et al.* Expert consensus on atrial cardiomyopathies: definition, characterization, and clinical implication. *Europace* 2016;18:1455–90.
- [3] Mor-Avi V, Lang RM, Badano LP, Belohlavek M, Cardim NM, Derumeaux G *et al.* Current and evolving echocardiographic techniques for the quantitative evaluation of cardiac mechanics: consensus statement on methodology and indications. *Eur J Echocardiogr* 2011;12: 167–205.
- [4] Mitchell JH, Shapiro W. Atrial function and the hemodynamic consequences of atrial fibrillation in man. *Am J Cardiol* 1969;23:556–67.
- [5] Gupta S, Figueredo VM. Tachycardia mediated cardiomyopathy: pathophysiology, mechanisms, clinical features and management. *Int J Cardiol* 2014;172:40–6.

- [6] Gertz ZM, Raina A, Saghy L, Zado ES, Callans DJ, Marchlinski FE *et al.* Evidence of atrial functional mitral regurgitation due to atrial fibrillation: reversal with arrhythmia control. *J Am Coll Cardiol* 2011;58:1474–81.
- [7] Tilz RR, Rillig A, Thum AM, Arya A, Wohlmuth P, Metzner A *et al.* Catheter ablation of long-standing persistent atrial fibrillation: 5-year outcomes of the hamburg sequential ablation strategy. *J Am Coll Cardiol* 2012;60:1921–9.
- [8] Boersma LV, Castella M, van Boven W, Berruezo A, Yilmaz A, Nadal M *et al.* Atrial fibrillation catheter ablation versus surgical ablation treatment (FAST): a 2-center randomized clinical trial. *Circulation* 2012;125:23–30.
- [9] Kirchhof P, Benussi S, Kotecha D, Ahlsson A, Atar D, Casadei B *et al.* ESC guidelines for the management of atrial fibrillation developed in collaboration with EACTS. *Eur J Cardiothorac Surg* 2016;50:e1–e88.
- [10] Weimar T, Schena S, Bailey MS, Maniar HS, Schuessler RB, Cox JL *et al.* The Cox-maze procedure for lone atrial fibrillation: a single-center experience over 2 decades. *Circ Arrhythm Electrophysiol* 2012;5:8–14.
- [11] Haissaguerre M, Jais P, Shah DC, Takahashi A, Hocini M, Quiniou G *et al.* Spontaneous initiation of atrial fibrillation by ectopic beats originating in the pulmonary veins. *N Engl J Med* 1998;339:659–66.
- [12] Patterson E, Jackman WM, Beckman KJ, Lazzara R, Lockwood D, Scherlag BJ *et al.* Spontaneous pulmonary vein firing in man: relationship to tachycardia-pause early afterdepolarizations and triggered arrhythmia in canine pulmonary veins *in vitro*. *J Cardiovasc Electrophysiol* 2007;18:1067–75.
- [13] Atienza F, Almendral J, Moreno J, Vaidyanathan R, Talkachou A, Kalifa J *et al.* Activation of inward rectifier potassium channels accelerates atrial fibrillation in humans: evidence for a reentrant mechanism. *Circulation* 2006;114:2434–42.
- [14] Sanders P, Nalliah CJ, Dubois R, Takahashi Y, Hocini M, Rotter M *et al.* Frequency mapping of the pulmonary veins in paroxysmal versus permanent atrial fibrillation. *J Cardiovasc Electrophysiol* 2006;17:965–72.
- [15] Moe GK, Abildskov JA. Atrial fibrillation as a self-sustaining arrhythmia independent of focal discharge. *Am Heart J* 1959;58:59–70.
- [16] Cox JL, Canavan TE, Schuessler RB, Cain ME, Lindsay BD, Stone C *et al.* The surgical treatment of atrial fibrillation. II. Intraoperative electrophysiologic mapping and description of the electrophysiologic basis of atrial flutter and atrial fibrillation. *J Thorac Cardiovasc Surg* 1991;101:406–26.
- [17] Haissaguerre M, Hocini M, Denis A, Shah AJ, Komatsu Y, Yamashita S *et al.* Driver domains in persistent atrial fibrillation. *Circulation* 2014;130:530–8.
- [18] Ohtani K, Yutani C, Nagata S, Koretsune Y, Hori M, Kamada T. High prevalence of atrial fibrosis in patients with dilated cardiomyopathy. *J Am Coll Cardiol* 1995;25:1162–9.
- [19] Bailey GW, Braniff BA, Hancock EW, Cohn KE. Relation of left atrial pathology to atrial fibrillation in mitral valvular disease. *Ann Intern Med* 1968;69:13–20.
- [20] Kazui T, Henn MC, Watanabe Y, Kovacs SJ, Lawrance CP, Greenberg JW *et al.* The impact of 6 weeks of atrial fibrillation on left atrial and ventricular structure and function. *J Thorac Cardiovasc Surg* 2015;150:1602–8.
- [21] Frustaci A, Chimenti C, Bellocci F, Morgante E, Russo MA, Maseri A. Histological substrate of atrial biopsies in patients with lone atrial fibrillation. *Circulation* 1997;96:1180–4.
- [22] Venteclef N, Guglielmi V, Balse E, Gaborit B, Cotillard A, Atassi F *et al.* Human epicardial adipose tissue induces fibrosis of the atrial myocardium through the secretion of adipo-fibrokinases. *Eur Heart J* 2015;36:795–805a.
- [23] Corradi D, Callegari S, Benussi S, Nascimbene S, Pastori P, Calvi S *et al.* Regional left atrial interstitial remodeling in patients with chronic atrial fibrillation undergoing mitral-valve surgery. *Virchows Arch* 2004;445:498–505.
- [24] Allesie MA, de Groot NM, Houben RP, Schotten U, Boersma E, Smeets JL *et al.* Electropathological substrate of long-standing persistent atrial fibrillation in patients with structural heart disease: longitudinal dissociation. *Circ Arrhythm Electrophysiol* 2010;3:606–15.
- [25] Schotten U, Verheule S, Kirchhof P, Goette A. Pathophysiological mechanisms of atrial fibrillation: a translational appraisal. *Physiol Rev* 2011;91:265–325.
- [26] Jackson LR 2nd, Rathakrishnan B, Campbell K, Thomas KL, Piccini JP, Bahnson T *et al.* Sinus node dysfunction and atrial fibrillation: a reversible phenomenon? *Pacing Clin Electrophysiol* 2017;40:442–50.
- [27] Lim HS, Willoughby SR, Schultz C, Gan C, Alasady M, Lau DH *et al.* Effect of atrial fibrillation on atrial thrombogenesis in humans: impact of rate and rhythm. *J Am Coll Cardiol* 2013;61:852–60.
- [28] Marrouche NF, Wilber D, Hindricks G, Jais P, Akoum N, Marchlinski F *et al.* Association of atrial tissue fibrosis identified by delayed enhancement MRI and atrial fibrillation catheter ablation: the DECAAF study. *JAMA* 2014;311:498–506.
- [29] Cosio FG, Aliot E, Botto GL, Heidebuchel H, Geller CJ, Kirchhof P *et al.* Delayed rhythm control of atrial fibrillation may be a cause of failure to prevent recurrences: reasons for change to active antiarrhythmic treatment at the time of the first detected episode. *Europace* 2007;10:21–7.
- [30] Teh AW, Kistler PM, Lee G, Medi C, Heck PM, Spence SJ *et al.* Long-term effects of catheter ablation for lone atrial fibrillation: progressive atrial electroanatomic substrate remodeling despite successful ablation. *Heart Rhythm* 2012;9:473–80.
- [31] John B, Stiles MK, Kuklik P, Chandy ST, Young GD, Mackenzie L *et al.* Electrical remodelling of the left and right atria due to rheumatic mitral stenosis. *Eur Heart J* 2008;29:2234–43.
- [32] John B, Stiles MK, Kuklik P, Brooks AG, Chandy ST, Kalman JM *et al.* Reverse remodeling of the atria after treatment of chronic stretch in humans: implications for the atrial fibrillation substrate. *J Am Coll Cardiol* 2010;55:1217–26.
- [33] Verheule S, Wilson E, Everett T 4th, Shanbhag S, Golden C, Olgin J. Alterations in atrial electrophysiology and tissue structure in a canine model of chronic atrial dilatation due to mitral regurgitation. *Circulation* 2003;107:2615–22.
- [34] Le Bihan S, Della Togna DJ, Barretto RB, Assef JE, Machado LR, Ramos AI *et al.* Early improvement in left atrial remodeling and function after mitral valve repair or replacement in organic symptomatic mitral regurgitation assessed by three-dimensional echocardiography. *Echocardiography* 2015;32:1122–30.
- [35] Triposkiadis F, Pitsavos C, Boudoulas H, Trikas A, Kallikazaros I, Stefanadis C *et al.* Left atrial volume and function in valvular aortic stenosis. *J Heart Valve Dis* 1993;2:104–13.
- [36] Barbier P, Solomon SB, Schiller NB, Glantz SA. Left atrial relaxation and left ventricular systolic function determine left atrial reservoir function. *Circulation* 1999;100:427–36.
- [37] Hitch DC, Nolan SP. Descriptive analysis of instantaneous left atrial volume—with special reference to left atrial function. *J Surg Res* 1981;30:110–20.
- [38] Triposkiadis F, Tentolouris K, Androulakis A, Trikas A, Toutouzas K, Kyriakidis M *et al.* Left atrial mechanical function in the healthy elderly: new insights from a combined assessment of changes in atrial volume and transmitral flow velocity. *J Am Soc Echocardiogr* 1995;8:801–9.
- [39] Pagel PS, Kehl F, Gare M, Hettrick DA, Kersten JR, Wartier DC. Mechanical function of the left atrium: new insights based on analysis of pressure-volume relations and doppler echocardiography. *Anesthesiology* 2003;98:975–94.
- [40] Vieira MJ, Teixeira R, Goncalves L, Gersh BJ. Left atrial mechanics: echocardiographic assessment and clinical implications. *J Am Soc Echocardiogr* 2014;27:463–78.
- [41] Panovsky R, Pleva M, Feitova V, Kruzliak P, Meluzin J, Kincl V *et al.* Left atrium assessment: the evolving role of MRI. *J Cardiovasc Med (Hagerstown)* 2015;16:671–80.
- [42] Kotecha D, Lam CS, Van Veldhuisen DJ, Van Gelder IC, Voors AA, Rienstra M. Heart failure with preserved ejection fraction and atrial fibrillation: vicious twins. *J Am Coll Cardiol* 2016;68:2217–28.
- [43] Tsang TS, Barnes ME, Gersh BJ, Bailey KR, Seward JB. Risks for atrial fibrillation and congestive heart failure in patients  $\geq 65$  years of age with abnormal left ventricular diastolic relaxation. *Am J Cardiol* 2004;93:54–8.
- [44] Freed BH, Daruwalla V, Cheng JY, Aguilar FG, Beussink L, Choi A *et al.* Prognostic utility and clinical significance of cardiac mechanics in heart failure with preserved ejection fraction: importance of left atrial strain. *Circ Cardiovasc Imaging* 2016;9. doi: 10.1161/CIRCIMAGING.115.003754.
- [45] Voeller RK, Zierer A, Lall SC, Sakamoto S, Chang NL, Schuessler RB *et al.* The effects of the Cox maze procedure on atrial function. *J Thorac Cardiovasc Surg* 2008;136:1257–64, 1264.e1–3.
- [46] Feinberg MS, Waggoner AD, Kater KM, Cox JL, Lindsay BD, Perez JE. Restoration of atrial function after the maze procedure for patients with atrial fibrillation. assessment by doppler echocardiography. *Circulation* 1994;90:11285–92.
- [47] Benussi S, Pappone C, Nascimbene S, Oreto G, Caldarola A, Stefano PL *et al.* A simple way to treat chronic atrial fibrillation during mitral valve surgery: the epicardial radiofrequency approach. *Eur J Cardiothorac Surg* 2000;17:524–9.
- [48] Wijesurendra RS, Liu A, Eichhorn C, Ariga R, Levelt E, Clarke WT *et al.* Lone atrial fibrillation is associated with impaired left ventricular energetics that persists despite successful catheter ablation. *Circulation* 2016;134:1068–81.

- [49] Tinetti M, Costello R, Cardenas C, Piazza A, Iglesias R, Baranchuk A. Persistent atrial fibrillation is associated with inability to recover atrial contractility after MAZE IV surgery in rheumatic disease. *Pacing Clin Electrophysiol* 2012;35:999–1004.
- [50] Albirini A, Scalia GM, Murray RD, Chung MK, McCarthy PM, Griffin BP *et al.* Left and right atrial transport function after the maze procedure for atrial fibrillation: an echocardiographic doppler follow-up study. *J Am Soc Echocardiogr* 1997;10:937–45.
- [51] Compier MG, Tops LF, Braun J, Zeppenfeld K, Klautz RJ, Schalij MJ *et al.* Limited left atrial surgical ablation effectively treats atrial fibrillation but decreases left atrial function. *Europace* 2017;19:560–7.
- [52] De Maat GE, Benussi S, Hummel YM, Krul S, Pozzoli A, Driessen AH *et al.* Surgical left atrial appendage exclusion does not impair left atrial contraction function: a pilot study. *Biomed Res Int* 2015;2015:318901.
- [53] Hof IE, Vonken EJ, Velthuis BK, Wittkamp FH, van der Heijden JF, Neven KG *et al.* Impact of pulmonary vein antrum isolation on left atrial size and function in patients with atrial fibrillation. *J Interv Card Electrophysiol* 2014;39:201–9.
- [54] Ishii Y, Nitta T, Fujii M, Ogasawara H, Iwaki H, Ohkubo N *et al.* Serial change in the atrial transport function after the radial incision approach. *Ann Thorac Surg* 2001;71:572–6.
- [55] Debonnaire P, Leong DP, Witkowski TG, Al Amri I, Joyce E, Katsanos S *et al.* Left atrial function by two-dimensional speckle-tracking echocardiography in patients with severe organic mitral regurgitation: association with guidelines-based surgical indication and postoperative (long-term) survival. *J Am Soc Echocardiogr* 2013;26:1053–62.
- [56] Gossage AM, Braxton Hicks JA. On auricular fibrillation. *Q J Med* 1913;6: 435–40.
- [57] Selby DE, Palmer BM, LeWinter MM, Meyer M. Tachycardia-induced diastolic dysfunction and resting tone in myocardium from patients with a normal ejection fraction. *J Am Coll Cardiol* 2011;58:147–54.
- [58] Shinbane JS, Wood MA, Jensen DN, Ellenbogen KA, Fitzpatrick AP, Scheinman MM. Tachycardia-induced cardiomyopathy: a review of animal models and clinical studies. *J Am Coll Cardiol* 1997;29:709–15.
- [59] Dandamudi G, Rampurwala AY, Mahenthiran J, Miller JM, Das MK. Persistent left ventricular dilatation in tachycardia-induced cardiomyopathy patients after appropriate treatment and normalization of ejection fraction. *Heart Rhythm* 2008;5:1111–4.
- [60] Anselmino M, Matta M, D'ascenzo F, Bunch TJ, Schilling RJ, Hunter RJ *et al.* Catheter ablation of atrial fibrillation in patients with left ventricular systolic dysfunction: a systematic review and meta-analysis. *Circ Arrhythm Electrophysiol* 2014;7:1011–8.
- [61] Edner M, Caidahl K, Bergfeldt L, Darpo B, Edvardsson N, Rosenqvist M. Prospective study of left ventricular function after radiofrequency ablation of atrioventricular junction in patients with atrial fibrillation. *Br Heart J* 1995;74:261–7.
- [62] Kihara T, Gillinov AM, Takasaki K, Fukuda S, Song JM, Shiota M *et al.* Mitral regurgitation associated with mitral annular dilation in patients with lone atrial fibrillation: an echocardiographic study. *Echocardiography* 2009;26:885–9.
- [63] Zhou X, Otsuji Y, Yoshifuku S, Yuasa T, Zhang H, Takasaki K *et al.* Impact of atrial fibrillation on tricuspid and mitral annular dilatation and valvular regurgitation. *Circ J* 2002;66:913–6.
- [64] Yoo JS, Kim JB, Jung SH, Choo SJ, Chung CH, Lee JW. Impact of the maze procedure and postoperative atrial fibrillation on progression of functional tricuspid regurgitation in patients undergoing degenerative mitral repair. *Eur J Cardiothorac Surg* 2013;43:520–5.
- [65] Al-Saady NM, Obel OA, Camm AJ. Left atrial appendage: structure, function, and role in thromboembolism. *Heart* 1999;82:547–54.
- [66] Healey JS, Crystal E, Lamy A, Teoh K, Semelhago L, Hohnloser SH *et al.* Left atrial appendage occlusion study (LAAOS): results of a randomized controlled pilot study of left atrial appendage occlusion during coronary bypass surgery in patients at risk for stroke. *Am Heart J* 2005;150:288–93.
- [67] Kanderian AS, Gillinov AM, Pettersson GB, Blackstone E, Klein AL. Success of surgical left atrial appendage closure: assessment by transesophageal echocardiography. *J Am Coll Cardiol* 2008;52:924–9.
- [68] Ailawadi G, Gerdtsch MW, Harvey RL, Hooker RL, Damiano RJ Jr, Salamon T, Mack MJ. Exclusion of the left atrial appendage with a novel device: early results of a multicenter trial. *J Thorac Cardiovasc Surg* 2011; 142:1002–9, 1009.e1.
- [69] Benussi S, Mazzone P, Maccabelli G, Vergara P, Grimaldi A, Pozzoli A *et al.* Thoracoscopic appendage exclusion with an atriclip device as a solo treatment for focal atrial tachycardia. *Circulation* 2011;123:1575–8.
- [70] Viles-Gonzalez JF, Kar S, Douglas P, Dukkupati S, Feldman T, Horton R *et al.* The clinical impact of incomplete left atrial appendage closure with the watchman device in patients with atrial fibrillation: a PROTECT AF substudy. *J Am Coll Cardiol* 2012;59:923–9.
- [71] Piccini JP, Sievert H, Patel MR. Left atrial appendage occlusion: rationale, evidence, devices, and patient selection. *Eur Heart J* 2017;38:869–76.
- [72] Badhwar V, Rankin JS, Damiano RJ Jr, Gillinov AM, Bakaeen FG, Edgerton JR *et al.* The society of thoracic surgeons 2017 clinical practice guidelines for the surgical treatment of atrial fibrillation. *Ann Thorac Surg* 2017; 103:329–41.
- [73] Whitlock R, Healey J, Vincent J, Brady K, Teoh K, Royse A *et al.* Rationale and design of the left atrial appendage occlusion study (LAAOS) III. *Ann Cardiothorac Surg* 2014;3:45–54.
- [74] Ruff CT, Giugliano RP, Braunwald E, Hoffman EB, Deenadayalu N, Ezekowitz MD *et al.* Comparison of the efficacy and safety of new oral anticoagulants with warfarin in patients with atrial fibrillation: a meta-analysis of randomised trials. *Lancet* 2014;383:955–62.
- [75] Yao X, Abraham NS, Sangaralingham LR, Belloio MF, McBane RD, Shah ND *et al.* Effectiveness and safety of dabigatran, rivaroxaban, and apixaban versus warfarin in nonvalvular atrial fibrillation. *J Am Heart Assoc* 2016;5:e003725.
- [76] Rillig A, Lin T, Plesman J, Heeger CH, Lemes C, Metzner A *et al.* Apixaban, rivaroxaban, and dabigatran in patients undergoing atrial fibrillation ablation. *J Cardiovasc Electrophysiol* 2016;27:147–53.
- [77] Ad N, Henry L, Hunt S. The impact of surgical ablation in patients with low ejection fraction, heart failure, and atrial fibrillation. *Eur J Cardiothorac Surg* 2011;40:70–6.
- [78] Saint LL, Damiano RJ Jr, Cuculich PS, Guthrie TJ, Moon MR, Munfakh NA *et al.* Incremental risk of the cox-maze IV procedure for patients with atrial fibrillation undergoing mitral valve surgery. *J Thorac Cardiovasc Surg* 2013;146:1072–7.
- [79] Sunderland N, Nagendran M, Maruthappu M. In patients with an enlarged left atrium does left atrial size reduction improve maze surgery success? *Interact CardioVasc Thorac Surg* 2011;13:635–41.
- [80] Pozzoli A, Taramasso M, Coppola G, Kamami M, La Canna G, Bella PD *et al.* Maze surgery normalizes left ventricular function in patients with persistent lone atrial fibrillation. *Eur J Cardiothorac Surg* 2014;46:871–6.
